# Supplementary material for: RNA profile diversity across arthropoda: guidelines, methodological artifacts, and expected outcomes
Source: PubMed Central journal article supplement (PMC6994094; doi:10.1093/biomethods/bpy012), 2018-12-15
Supplement: bpy012_figure_s1.pdf [file bpy012_figure_s1.pdf]

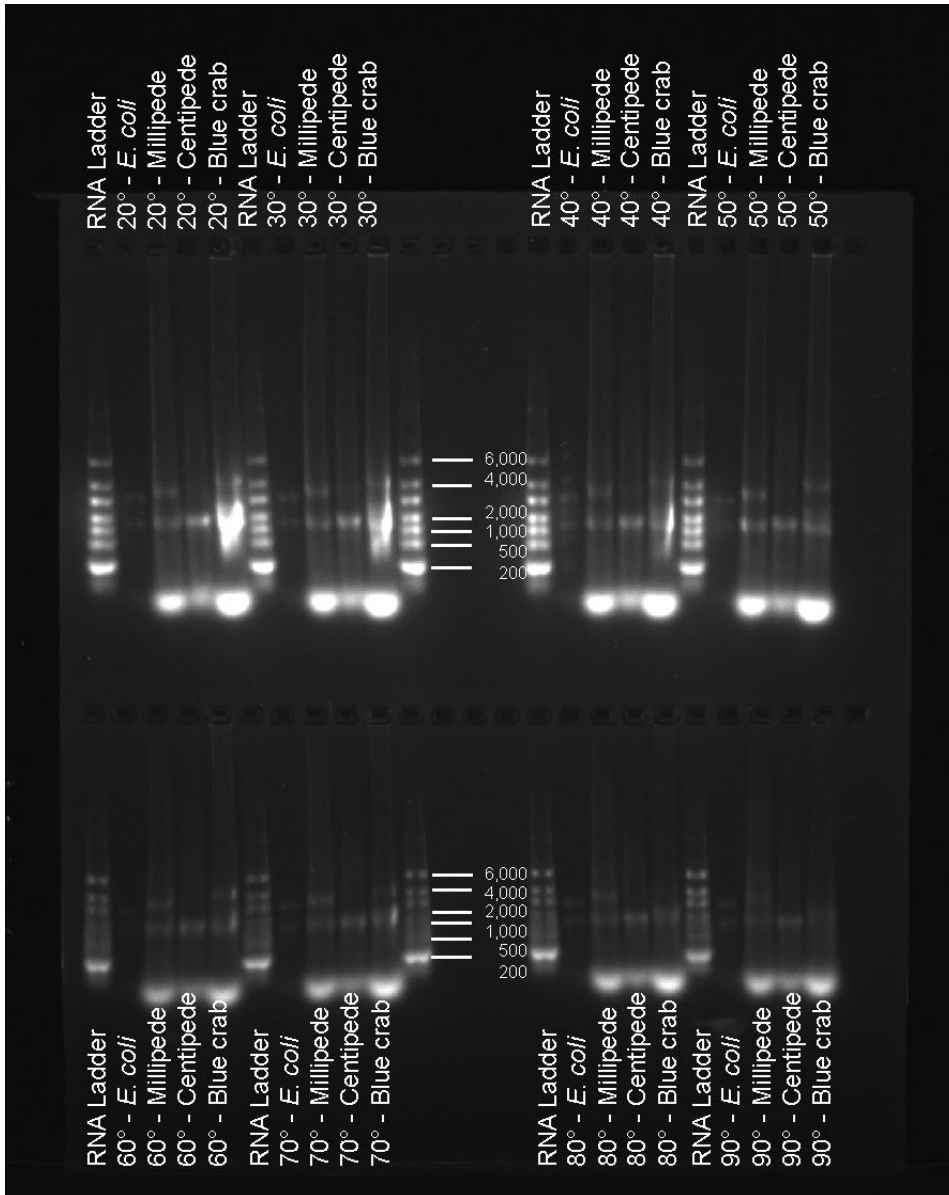

**Figure S1-** Temperature gradient (denaturing treatment) on a 1% TAE agarose bleach gel for three representative taxa and a positive control: *Escherichia coli* (Qubit Standard 2), Millipede (HBG5053), Centipede (HBG5058), and Blue crab (HBG5273). (A) 20 - 30°C, (B) 40 - 50°C, (C) 60 - 70°C, and (D) 80 - 90°C. RNA ladder fragment sizes (Thermofisher Riboruler) are given in base pairs (bp). These samples correspond to the electropherograms in Figure 2.
